# Supplementary material
Source: PubMed Central journal article supplement (PMC5764162)
Supplement: NIHMS906932-supplement-10803_2017_3304_MOESM1_ESM.pdf [file NIHMS906932-supplement-10803_2017_3304_MOESM1_ESM.pdf]

Supplement Table 1: Spearman correlations between Mullen Scales of Early Learning (MSEL), Vineland Adaptive Behavior Scales (VABS), and ADOS- Calibrated Severity Score (ADOS-CSS).

|                                    | <i>MSEL DQ Composite</i> | <i>VABS Composite score</i> | <i>ADOS<sup>a</sup> CSS</i> | <i>MSEL DQ Verbal Subscale</i> | <i>MSEL DQ Nonverbal Subscale</i> | <i>VABS Communication Subscale</i> | <i>VABS Daily Living Subscale</i> | <i>VABS Socialization Subscale</i> | <i>VABS Motor Skills Subscale</i> |
|------------------------------------|--------------------------|-----------------------------|-----------------------------|--------------------------------|-----------------------------------|------------------------------------|-----------------------------------|------------------------------------|-----------------------------------|
| <i>MSEL DQ Composite</i>           | 1.00                     |                             |                             |                                |                                   |                                    |                                   |                                    |                                   |
| <i>VABS Composite score</i>        | 0.68                     | 1.00                        |                             |                                |                                   |                                    |                                   |                                    |                                   |
| <i>ADOS<sup>a</sup> CSS</i>        | -0.19                    | -0.10                       | 1.00                        |                                |                                   |                                    |                                   |                                    |                                   |
| <i>MSEL DQ Verbal Subscale</i>     | 0.96                     | 0.63                        | -0.18                       | 1.00                           |                                   |                                    |                                   |                                    |                                   |
| <i>MSEL DQ Nonverbal Subscale</i>  | 0.93                     | 0.67                        | -0.19                       | 0.79                           | 1.00                              |                                    |                                   |                                    |                                   |
| <i>VABS Communication Subscale</i> | 0.79                     | 0.84                        | -0.15                       | 0.78                           | 0.70                              | 1.00                               |                                   |                                    |                                   |
| <i>VABS Daily Living Subscale</i>  | 0.49                     | 0.82                        | -0.08                       | 0.42                           | 0.52                              | 0.61                               | 1.00                              |                                    |                                   |
| <i>VABS Socialization Subscale</i> |                          |                             |                             |                                |                                   |                                    |                                   | 1.00                               |                                   |
| <i>VABS Motor Skills Subscale</i>  | 0.56                     | 0.82                        | -0.09                       | 0.54                           | 0.53                              | 0.74                               | 0.61                              | 1.00                               |                                   |
|                                    | 0.46                     | 0.85                        | -0.02                       | 0.39                           | 0.51                              | 0.54                               | 0.66                              | 0.53                               | 1.00                              |

<sup>a</sup> ADOS= Autism Diagnostic Observational Schedule

Supplemental Table 2: Pearson Correlations Between and Within Pollutants For Pregnancy and the First Year of Life\*\*

|                     |       | All Pregnancy |       |      |       |       |  |
|---------------------|-------|---------------|-------|------|-------|-------|--|
|                     |       | TRP           | PM2.5 | PM10 | Ozone | NO2   |  |
| 1st year of<br>life | TRP   | 0.91          | 0.09  | 0.05 | -0.33 | 0.41  |  |
|                     | PM2.5 | -0.06         | 0.54  | 0.69 | -0.21 | 0.5   |  |
|                     | PM10  | -0.02         | 0.78  | 0.75 | 0.04  | 0.49  |  |
|                     | Ozone | -0.37         | 0.24  | 0.22 | 0.71  | -0.45 |  |
|                     | NO2   | 0.34          | 0.48  | 0.5  | -0.35 | 0.85  |  |

\* Light grey shading denotes correlates between pollutants during pregnancy, dark grey shading denotes correlations between pollutants during the first year of life, white cells indicate correlation of the pollutant across time

Supplemental Table 3: Further Adjusted Association of Air Pollutant Exposure During Entire Pregnancy and Year 1 of Life with VABS, MSEL, and CSS Scores

| Time                        | Score                       | Air Pollutant Exposure <sup>b</sup> (N=327) |                    |                    |                  |                   |                   |                   |                  |                  |                  |
|-----------------------------|-----------------------------|---------------------------------------------|--------------------|--------------------|------------------|-------------------|-------------------|-------------------|------------------|------------------|------------------|
|                             |                             | NO <sub>2</sub>                             | 95% CI             | O <sub>3</sub>     | 95% CI           | PM <sub>10</sub>  | 95% CI            | PM <sub>2.5</sub> | 95% CI           | NRAP             | 95% CI           |
| Prenatal                    | VABS Composite Score        | -13.13%                                     | (-19.57%, -2.45%)* | -0.68%             | (-8.50%, 7.18%)  | -8.63%            | (-26.93%, 9.98%)  | 2.98%             | (-5.17%, 11.22%) | -1.09%           | (-9.88%, 7.72%)  |
|                             | VABS Communication Subscale | -15.80%                                     | (-27.32%, -4.09%)* | 0.39%              | (-8.61%, 9.45%)  | -7.67%            | (-28.73%, 13.79%) | 3.37%             | (-6.00%, 12.87%) | -1.65%           | (-11.75%, 8.49%) |
|                             | VABS Daily Living Subscale  | -13.87%                                     | (-23.79%, -3.80%)* | 1.70%              | (-6.03%, 9.49%)  | -11.91%           | (-29.91%, 6.39%)  | 1.59%             | (-6.45%, 9.72%)  | -3.38%           | (-12.04%, 5.31%) |
|                             | VABS Socialization Subscale | -8.25%                                      | (-17.32%, 0.94%)   | -1.71%             | (-8.64%, 5.27%)  | -1.14%            | (-17.54%, 15.51%) | 3.20%             | (-4.04%, 10.52%) | 0.71%            | (-7.10%, 8.54%)  |
|                             | VABS Motor Skills Subscale  | -3.42                                       | (-8.02, 1.17)      | -0.81              | (-4.26, 2.65)    | -3.30             | (-11.51, 4.90)    | 1.57              | (-2.03, 5.17)    | 0.53             | (-3.35, 4.42)    |
|                             | MSEL Composite DQ           | -7.12                                       | (-12.96, -1.29)*   | 0.01               | (-2.70, 2.72)    | -3.20             | (-9.63, 3.22)     | 1.80              | (-2.70, 6.30)    | -0.69            | (-1.93, 0.55)    |
|                             | MSEL Verbal DQ              | -8.59                                       | (-15.27, -1.91)*   | 0.30               | (-4.76, 5.36)    | -6.18             | (-18.17, 5.82)    | 1.54              | (-3.73, 6.81)    | -4.46            | (-10.12, 1.20)   |
|                             | MSEL Non Verbal DQ          | -5.66                                       | (-11.30, -0.02)*   | -0.27              | (-4.53, 3.99)    | -4.27             | (-14.37, 5.83)    | 2.14              | (-2.29, 6.56)    | -1.05            | (-5.83, 3.73)    |
|                             | ADOS CSS                    | 0.18                                        | (-0.23, 0.60)      | 0.15               | (-0.17, 0.46)    | 0.12              | (-0.62, 0.85)     | 0.17              | (-0.16, 0.49)    | 0.12             | (-0.22, 0.47)    |
|                             | Year 1                      | VABS composite score                        | -17.3%             | (-23.84%, -5.13%)* | 0.43%            | (-11.90%, 12.91%) | -17.05%           | (-42.84%, 9.36%)  | -2.16%           | (-11.71%, 7.53%) | 0.70%            |
| VABS Communication Subscale |                             | -21.3%                                      | (-33.80%, -8.53%)* | 4.79%              | (-9.42%, 19.18%) | -21.24%           | (-50.69%, 9.03%)  | -4.48%            | (-15.40%, 6.62%) | 0.38%            | (-9.94%, 10.74%) |
| VABS Daily Living Subscale  |                             | -16.31%                                     | (-27.20%, -5.24%)* | 4.00%              | (-8.21%, 16.34%) | -0.10%            | (-26.02%, 26.45%) | 2.32%             | (-7.18%, 11.94%) | -4.10%           | (-12.94%, 4.77%) |
| VABS Socialization Subscale |                             | -11.56%                                     | (-21.48%, -1.49%)* | -2.10%             | (-13.03%, 8.94%) | -17.57%           | (-40.46%, 5.82%)  | -3.94%            | (-12.40%, 4.62%) | 2.33%            | (-5.64%, 10.33%) |
| VABS Motor Skills Subscale  |                             | -4.42                                       | (-9.48, 0.64)      | -1.16              | (-6.62, 4.30)    | -4.15             | (-15.85, 7.54)    | 0.65              | (-3.60, 4.90)    | 1.56             | (-2.40, 5.52)    |
| MSEL Composite DQ           |                             | -9.50                                       | (-15.91, -3.10)*   | 1.12               | (-3.15, 5.39)    | -0.83             | (-10.00, 8.33)    | 0.27              | (-5.04, 5.58)    | -0.59            | (-1.85, 0.67)    |
| MSEL Verbal DQ              |                             | -10.72                                      | (-18.03, -3.40)*   | 2.67               | (-5.30, 10.63)   | -3.71             | (-20.78, 13.36)   | -0.46             | (-6.66, 5.74)    | -3.00            | (-8.77, 2.77)    |
| MSEL Non Verbal DQ          |                             | -8.29                                       | (-14.49, -2.10)*   | 0.98               | (-5.75, 7.71)    | 0.99              | (-13.43, 15.41)   | 1.02              | (-4.22, 6.25)    | -1.70            | (-6.58, 3.18)    |
| ADOS CSS                    |                             | 0.33                                        | (-0.13, 0.78)      | -0.13              | (-0.62, 0.36)    | -0.08             | (-1.13, 0.97)     | -0.05             | (-0.44, 0.33)    | 0.18             | (-0.17, 0.54)    |

<sup>a</sup>All models were adjusted for gestational weeks, year of birth, sex, max education in the home, referral center, race, mother's age, prenatal smoking, season of conception and home ownership

<sup>b</sup>Pollutant effects were scaled to 2 SD of the distribution of the pregnancy average exposure: 6.82 ppb for NO<sub>2</sub>, 11.1 ppb for O<sub>3</sub>, 11.6 µg/m<sup>3</sup> for PM<sub>10</sub>, 6.97 µg/m<sup>3</sup> for PM<sub>2.5</sub> and 27.3 ppb for NRAP

\* p<0.05

Supplement Table 4: Pearson Correlations for NO<sub>2</sub>  
 Between Each Trimester and the 1st Year of Life

| NO <sub>2</sub> | 1st Year | Trimester 1 | Trimester 2 | Trimester 3 |
|-----------------|----------|-------------|-------------|-------------|
| 1st Year        | 1.00     |             |             |             |
| Trimester 1     | 0.62     | 1.00        |             |             |
| Trimester 2     | 0.66     | 0.46        | 1.00        |             |
| Trimester 3     | 0.65     | -0.03       | 0.48        | 1.00        |

Supplemental Table 5: Distribution of cognitive and adaptive function scores by sociodemographic characteristics and maternal smoking during pregnancy among typically developing controls.

| Covariate                     | n (%)             | VABS Composite Score<br>mean±sd | MSEL Composite DQ Score<br>mean±sd |
|-------------------------------|-------------------|---------------------------------|------------------------------------|
| <b>Overall score</b>          | <b>227 (100%)</b> | <b>105.4 ± 14.9</b>             | <b>107.0±14.7</b>                  |
| <b>Sex</b>                    |                   |                                 |                                    |
| Female                        | 41 (18.1%)        | 111.6 ± 15.3                    | 111.5±14.0                         |
| Male                          | 186 (81.9%)       | 104.1 ± 14.5                    | 106.0±14.7                         |
|                               | <i>p value</i>    | <i>0.005463</i>                 | <i>0.02592</i>                     |
| <b>Center</b>                 |                   |                                 |                                    |
| Alta                          | 91 (40.1%)        | 104.7 ± 16.0                    | 104.2±14.6                         |
| North Bay                     | 39 (17.2%)        | 104.2 ± 13.7                    | 107.1±13.7                         |
| RC of the East                | 58 (25.5%)        | 106.1 ± 15.8                    | 111.5±14.6                         |
| Bay Valley                    | 39 (17.2%)        | 107.3 ± 12.4                    | 106.4±15.0                         |
| Mountain                      | <i>p value</i>    | <i>0.76</i>                     | <i>0.0335</i>                      |
| <b>Race</b>                   |                   |                                 |                                    |
| White                         | 117 (51.5%)       | 105.8 ± 15.4                    | 107.9±15.1                         |
| Hispanic                      | 63 (27.8%)        | 105.3 ± 14.8                    | 104.6±14.5                         |
| Other                         | 47 (20.7%)        | 104.6 ± 14.2                    | 107.8±13.8                         |
|                               | <i>p value</i>    | <i>0.90</i>                     | <i>0.313</i>                       |
| <b>Education</b>              |                   |                                 |                                    |
| Less than College             | 84 (37.0%)        | 104.67 ± 14.2                   | 102.1±13.0                         |
| College grad                  | 86 (37.9%)        | 107 ± 14.9                      | 109.2±14.0                         |
| Grad/Prof degree              | 57 (25.1%)        | 104.1 ± 16                      | 110.7±16.4                         |
|                               | <i>p value</i>    | <i>0.45</i>                     | <i>0.000581</i>                    |
| <b>Mother's Age</b>           |                   |                                 |                                    |
| Under 35                      | 173 (76.2%)       | 105.4 ± 14.7                    | 106.3±13.8                         |
| 35+                           | 54 (23.8%)        | 105.3 ± 15.9                    | 109.2±17.3                         |
|                               | <i>p value</i>    | <i>0.97</i>                     | <i>0.2637</i>                      |
| <b>Smoking while pregnant</b> |                   |                                 |                                    |
| No                            | 213 (93.8%)       | 105.2 ± 14.9                    | 107.0±14.8                         |
| Yes                           | 14 (6.2%)         | 108.6 ± 15.2                    | 106.4±13.0                         |
|                               | <i>p value</i>    | <i>0.42</i>                     | <i>0.8753</i>                      |
| <b>Season of Conception</b>   |                   |                                 |                                    |
| Warm                          | 117 (51.5%)       | 104.7 ± 15.2                    | 107.4±15.0                         |
| Cool                          | 110 (48.5%)       | 106.2 ± 14.7                    | 106.5±14.4                         |
|                               | <i>p value</i>    | <i>0.47</i>                     | <i>0.619</i>                       |
| <b>Home Owner</b>             |                   |                                 |                                    |
| No                            | 46 (20.3%)        | 105.0 ± 14.8                    | 102.1±15.7                         |
| Yes                           | 181 (79.7%)       | 105.5 ± 15                      | 108.2±14.2                         |
|                               | <i>p value</i>    | <i>0.85</i>                     | <i>0.0122</i>                      |

Supplemental Table 6: Adjusted<sup>a</sup> Association of Air Pollutant Exposure During Entire Pregnancy and Year 1 of Life with VABS, MSEL, and CSS S

| Time     | Score                              | Air Pollutant Exposure <sup>b</sup> (N=22) |             |              |                |              |               |                  |        |    |
|----------|------------------------------------|--------------------------------------------|-------------|--------------|----------------|--------------|---------------|------------------|--------|----|
|          |                                    | NO <sub>2</sub>                            | 95% CI      |              | O <sub>3</sub> | 95% CI       |               | PM <sub>10</sub> | 95% CI |    |
| Prenatal | <i>VABS Composite Score</i>        | 0.60%                                      | -4.59%      | 6.07%        | 1.42%          | -2.68%       | 5.69%         | 2.43%            | -3.66% | 8  |
|          | <i>VABS Communication Subscale</i> | -0.13%                                     | -4.71%      | 4.67%        | 0.80%          | -2.82%       | 4.55%         | 1.44%            | -3.93% | 7  |
|          | <i>VABS Daily Living Subscale</i>  | -1.54%                                     | -6.51%      | 3.69%        | 2.43%          | -1.62%       | 6.63%         | 2.13%            | -3.82% | 8  |
|          | <i>VABS Socialization Subscale</i> | -0.98%                                     | -5.26%      | 3.49%        | 1.07%          | -2.35%       | 4.61%         | -0.07%           | -5.06% | 5  |
|          | <i>VABS Motor Skills Subscale</i>  | 4.42                                       | -0.89       | 9.72         | 0.48           | -3.68        | 4.64          | 3.82             | -2.18  | 1  |
|          | <i>MSEL Composite DQ</i>           | 3.22                                       | -1.95       | 8.38         | 0.76           | -3.28        | 4.80          | 2.35             | -3.55  |    |
|          | <i>MSEL Verbal DQ</i>              | 2.76                                       | -3.44       | 8.97         | 0.37           | -4.48        | 5.22          | 1.96             | -5.15  |    |
|          | <i>MSEL Non Verbal DQ</i>          | 3.67                                       | -1.51       | 8.85         | 1.15           | -2.91        | 5.20          | 2.74             | -3.16  |    |
| Year 1   | <i>VABS composite score</i>        | 4.63%                                      | -1.46%      | 11.09%       | 4.40%          | -0.89%       | 9.97%         | 4.21%            | -3.36% | 11 |
|          | <i>VABS Communication Subscale</i> | 2.89%                                      | -2.45%      | 8.52%        | 3.43%          | -1.24%       | 8.32%         | 5.08%            | -1.71% | 11 |
|          | <i>VABS Daily Living Subscale</i>  | 2.31%                                      | -3.54%      | 8.51%        | <b>6.06%</b>   | <b>0.83%</b> | <b>11.56%</b> | 0.06%            | -7.08% | 7  |
|          | <i>VABS Socialization Subscale</i> | -0.77%                                     | -5.64%      | 4.34%        | 3.00%          | -1.38%       | 7.58%         | 1.72%            | -4.50% | 8  |
|          | <i>VABS Motor Skills Subscale</i>  | <b>8.61</b>                                | <b>2.65</b> | <b>14.57</b> | 1.30           | -3.97        | 6.57          | 5.82             | -1.50  | 1  |
|          | <i>MSEL Composite DQ</i>           | 5.39                                       | -0.47       | 11.24        | 2.99           | -2.12        | 8.10          | 4.68             | -2.49  | 1  |
|          | <i>MSEL Verbal DQ</i>              | 3.95                                       | -3.11       | 11.00        | 3.87           | -2.25        | 10.00         | 3.50             | -5.22  | 1  |
|          | <i>MSEL Non Verbal DQ</i>          | <b>6.83</b>                                | <b>0.98</b> | <b>12.68</b> | 2.11           | -3.02        | 7.25          | 5.86             | -1.27  | 1  |

<sup>a</sup>All models were adjusted for sex, max education in the home, referral center, race, mother's age, prenatal smoking, season of conception and home

<sup>b</sup>Pollutant effects were scaled to 2 SD of the distribution of the pregnancy average exposure: 6.82 ppb for NO<sub>2</sub>, 11.1 ppb for O<sub>3</sub>, 11.6 µg/m<sup>3</sup> for PM<sub>10</sub>

\* p<0.05
